# Supplementary material for: Breastfeeding practice, breastfeeding policy and hospitalisations for infectious diseases in early and later childhood: a register-based study in Uppsala County, Sweden
Source: HighWire-hosted journal article supplement (doi:10.1136/bmjopen-2020-046583), 2021-05-01
Supplement: bmjopen-2020-046583supp001_data_supplement.pdf [file bmjopen-2020-046583supp001_data_supplement.pdf]

## Appendix A

Table A: Infectious disease categories and associated ICD-10 codes

| Category                           | Group                             | ICD codes                                                                                                         |
|------------------------------------|-----------------------------------|-------------------------------------------------------------------------------------------------------------------|
| Enteric infections                 | Enteric infections                | A00, A01, A020, A029, A03, A04, A05, A06, A07,A08                                                                 |
|                                    | Enteric symptoms                  | A09, I880, K528, K529, R11                                                                                        |
| Upper respiratory tract infections | Upper RTI                         | J00, J01, J02, J03, J04, J05, J06, J32, J340, J36, J37, J390, J391                                                |
|                                    | Ear infections                    | H600, H601, H602, H603, H608, H609, H62, H65, H66, H67, H680, H70, H730, H750, H830, H940                         |
| Lower respiratory tract infections | Acute lower RTI                   | A481, A482, B59, J09, J10, J11, J12, J13, J14, J15, J16, J17, J18, J20, J21, J22                                  |
|                                    | Chronic lower RTI                 | J40, J41, J42, J440, J47, J85, J86, J988                                                                          |
|                                    | Tuberculosis                      | A15, A16, A17, A18, A19, N740, N741, J65                                                                          |
| Other infections                   | Sepsis                            | A391, A392, A393, A394, A395, A398, A399 A40, A41, A483, A021, A327                                               |
|                                    | HIV/AIDS                          | B20, B21. B22, B23, B24                                                                                           |
|                                    | STI                               | A50, A51, A52, A53, A54, A55, A56, A57, A58, A59, A60, A63, A64, N290                                             |
|                                    | CNS viral infections              | A801, A802, A803, A804, A809, A811, A812, A818, A819, A82, A83, A84, A85, A86, A87, A88, A89                      |
|                                    | CNS general infections            | G00, G01, G02, G030, G039, G04, G05, G06, G07, G08, G09, G610, A321, A390                                         |
|                                    | Eye infections                    | B30, H000, H03, H043, H050, H100, H102, H103, H109, H130, H131, H160, H190, H191, H192, H220, H440, H451          |
|                                    | Oral infections                   | K02, K044, K046, K050, K052, K053, K113, K122                                                                     |
|                                    | Heart and Circulatory infections  | B332, I00, I01, I02, I05, I06, I07, I08, I09, I301, I33, I38, I39, I400, I410, I411, I412, I430, I716, I790, I791 |
|                                    | Gastrointestinal tract infections | K230, K231, K25, K26, K27, K28, K293, K294, K295, K35, K36, K37, K61, K630, K632, K650, K678, K908, K930          |
|                                    | Hepatic infections                | K750, K770, K830                                                                                                  |
|                                    | Viral Hepatitis                   | B15, B16, B17, B18, B19                                                                                           |

|                                        |                                                                                                                                                                                                                   |
|----------------------------------------|-------------------------------------------------------------------------------------------------------------------------------------------------------------------------------------------------------------------|
| Kidney infections                      | N00, N05, N10, N136, N151                                                                                                                                                                                         |
| Urinary tract infections               | N300, N341, N351, N37, N390                                                                                                                                                                                       |
| Reproductive system infections, male   | N410, N411, N412, N413, N431, N45, N410, N411, N412, N413, N431, N45, N481, N482, N490, N49, N51                                                                                                                  |
| Reproductive system infections, female | N70, N71, N72, N73, N74, N751, N764, N87                                                                                                                                                                          |
| Skin infections, typical               | A46, L00, L01, L02, L03, L04, L050, L08                                                                                                                                                                           |
| Skin infections, other                 | B86, T009, T633, T634, T793                                                                                                                                                                                       |
| Breast infections                      | N61                                                                                                                                                                                                               |
| Osteomyelitis                          | M462, M463, M464, M465                                                                                                                                                                                            |
| Joint infections                       | M00, M01                                                                                                                                                                                                          |
| Connective tissue infections           | M021, M023, M03, M600, M630, M631, M632, M650, M651, M680, M710, M711, M896                                                                                                                                       |
| Neoplasms from infection               | C11, C161, C162, C163, C164, C165, C166, C168, C169, C210, C211, C220, C46, C53, D002, D013, D06                                                                                                                  |
| Postoperative infections               | T802, T814, T826, T827, T835, T836, T845, T846, T847, T857, T874                                                                                                                                                  |
| Adverse effect of ID treatment         | R761, R762, T36, T37, T485, T487, T490, T495, T496, T499, T788, T789, T880, T881, T887                                                                                                                            |
| Other Bacterial infections             | A20, A21, A22, A23, A24, A25, A26, A27, A28, A30, A31, A320, A328, A329, A33, A34, A35, A36, A37, A38, A42, A43, A44, A480, A484, A488, A49, A65, A66, A67, A68, A69, A70, A71, A74, A75, A77, A78, A79, B95, B96 |
| Other Viral infections                 | A90, A91, A92, A93, A94, A95, A96, A98, A99, B00, B01, B02, B03, B04, B05, B06, B07, A08, B09, B25, B26, B27, B33, B34, B97                                                                                       |
| Other Mycoses                          | B35, B36, B37, B38, B39, B40, B41, B42, B43, B44, B45, B46, B47, B48, B49                                                                                                                                         |
| Other Protozoan infections             | B50, B51, B52, B53, B54, B55, B56, B57, B58, B60, B64                                                                                                                                                             |
| Other ID                               | B65, B66, B67, B68, B69, B70, B71, B72, B73, B74, B75, B76, B77, B78, B79, B80, B81, B82, B83, B85, B86, B87, B88, B89, B94, B99, E033, E321, F024, F071, I88, T64                                                |
| Perinatal infections                   | P002, P027, P23, P35, P36, P37, P38, P39                                                                                                                                                                          |

ICD-10, International Classification of Disease, Tenth Revision. RTI, respiratory tract infections. CNS, central nervous system. ID, infectious diseases.
